# Supplementary material for: Combined procedure with radial probe and convex probe endobronchial ultrasound
Source: Research Square preprint supplement (doi:10.21203/rs.3.rs-1817408/v1), 2022-07-06
Supplement: Supplementary file 1 [file 03344f5b0c01441d3154c593.docx]

Table 1. Baseline characteristics.

| Variables | RP-EBUS group  (n = 506) | Combination group* (n = 97 ) | *P*-value |
| --- | --- | --- | --- |
| Male sex | 310 (61.3) | 80 (82.5) | < 0.001 |
| Age, years | 68.1 (±10.1) | 70.4 (±8.9) | 0.021 |
| Location of PLL |  |  | 0.251 |
| Right upper lobe | 154 (30.4) | 24 (24.7) |  |
| Right middle lobe | 34 (6.7) | 11 (11.3) |  |
| Right lower lobe | 108 (21.3) | 26 (26.8) |  |
| Left upper lobe | 138 (27.3) | 21 (21.6) |  |
| Left lower lobe | 72 (14.2) | 15 (15.5) |  |
| Mean diameter of PLL, mm | 29.7 (±14.2) | 36.9 (±17.2) | < 0.001 |
| Distance from pleura to PLL, mm | 12.9 (±14.4) | 12.8 (±14.9) | 0.922 |
| Positive bronchus sign on CT scan | 426 (84.2) | 91 (93.8) | 0.022 |
| Character of PLL on CT scan |  |  | 0.039 |
| Solid | 436 (86.2) | 92 (94.8) |  |
| Mixed | 68 (13.4) | 5 (5.2) |  |
| Ground-glass opacity | 7 (1.4) | 0 (0) |  |

RP-EBUS = radial probe endobronchial ultrasound; PLL = peripheral lung lesion.

*The combination group included patients who underwent a combined procedure using RP-EBUS and convex probe EBUS.

Table 2. Clinical diagnoses.

| Variables | RP-EBUS group  (n = 506) | Combination group*  (n = 97 ) |
| --- | --- | --- |
| Malignant disease |  |  |
| Lung cancer |  |  |
| Adenocarcinoma | 230 (45.5) | 48 (49.5) |
| Squamous cell carcinoma | 69 (13.6) | 28 (28.9) |
| Non-small cell lung cancer, NOS | 22 (4.4) | 4 (4.1) |
| Small cell lung cancer | 19 (3.8) | 13 (13.4) |
| Metastasis from extrathoracic malignancy |  |  |
| Renal cell cancer | 2 (0.4) | 0 (0.0) |
| Biliary cancer | 1 (0.2) | 0 (0.0) |
| Lymphoma | 0 (0.0) | 1 (1.0) |
| Benign disease |  |  |
| Pulmonary tuberculosis | 17 (3.4) | 0 (0.0) |
| Aspergilloma | 6 (1.2) | 0 (0.0) |
| Necrotizing pneumonia | 3 (0.6) | 0 (0.0) |
| Cryptococcosis | 2 (0.4) | 0 (0.0) |
| Benign disease, NOS† | 12 (2.4) | 3 (3.1) |
| Undiagnosed | 123 (24.3) | 0 (0.0) |

RP-EBUS = radial probe endobronchial ultrasound; NOS = not otherwise specified.

*The combination group included patients who underwent a combined procedure using RP-EBUS and convex probe EBUS.

†Benign disease, NOS was defined when inflammatory cells were detected only or a benign pathology was evident in biopsy specimens, with no change over at least 12 months of follow-up.

Table 3. Clinical outcomes of groups A, B, and C.

| Diagnosis | Group A  (n = 47) | Group B  (n = 32) | Group C  (n = 9) |
| --- | --- | --- | --- |
| Non-small cell lung cancer | 39/47 | 29/32 | 7/9 |
| Clinical stage |  |  |  |
| I | 0/39 (0) | 8/29 (27.6) | 0/9 (0) |
| II | 0/39 (0) | 19/29 (65.5) | 0/9 (0) |
| III | 37/39 (94.9) | 0/29 (0) | 7/9 (100.0) |
| IV | 2/39 (5.1) | 2/29 (6.9) | 0/9 (0) |
| Treatment |  |  |  |
| Stereotactic body radiation therapy | 0/39 (0) | 2/29 (6.9) | 0/9 (0) |
| Thoracoscopic surgery | 17/39 (43.6) | 19/29 (65.5) | 5/9 (71.4) |
| Concurrent chemoradiation therapy | 9/39 (23.1) | 0/29 (0) | 1/9 (14.3) |
| Palliative chemotherapy | 8/39 (20.5) | 2/29 (6.9) | 1/9 (14.3) |
| Follow-up loss | 5/39 (12.8) | 6/29 (20.7) | 0/9 (0) |
| Small-cell lung cancer | 8/47 | 3/32 | 2/9 |
| Limited stage | 0/8 (0) | 2/3 (66.7) | 0/2 (0) |
| Extensive stage | 8/8 (100) | 1/3 (33.3) | 2/2 (100) |
